# Supplementary material
Source: PubMed Central journal article supplement (PMC9195941)
Supplement: aem.00226-22-s0004.pdf [file aem.00226-22-s0004.pdf]

***Supplementary Information for:***

**Variation in root exudate composition influences soil microbiome membership and functional potential**

*Authors:* Valerie A Seitz<sup>a\*</sup>, Bridget B McGivern<sup>b\*</sup>, Rebecca A Daly<sup>b</sup>, Jacqueline M Chaparro<sup>a</sup> Mikayla A Borton<sup>b</sup>, Amy M Sheflin<sup>a</sup>, Stephen Kresovich<sup>c</sup>, Lindsay Shields<sup>c</sup>, Meagan E Schipanski<sup>b</sup>, Kelly C Wrighton<sup>b</sup> and Jessica E Prenni<sup>a#</sup>

a. Department of Horticulture and Landscape Architecture, Colorado State University, Fort Collins, CO.

b. Department of Soil and Crop Sciences, Colorado State University, Fort Collins, CO.

c. Department of Plant and Environmental Sciences, Clemson University, Clemson, SC.

#Corresponding Author: J. Prenni, 1173 Campus Delivery, Colorado State University, Fort Collins, CO, 80523. [Jessica.prenni@colostate.edu](mailto:Jessica.prenni@colostate.edu)

\*Valerie A Seitz and Bridget B McGivern contributed equally to this work. Author order was determined based on timeline of joining the project.

***Running title:*** Root exudates influence soil microbiome dynamics

## **Supplementary Files**

**File S1:** Exudate and Exometabolite data.

**File S2:** 16S rRNA gene amplicon sequencing summary, ANCOM statistics, and feature table; metagenome sequencing and assembly statistics, metagenome-assembled genome summaries and abundance data.

**File S3:** DRAM annotation outputs for MAGs.

**File S4:** Raw DRAM annotations (can accessed using <https://doi.org/10.5281/zenodo.5639650>)

**File S5:** Synthetic exudate calculations for sugars

**File S6:** Synthetic exudate calculations for organic acids + final exudate treatment calculations

## Supplementary Figures

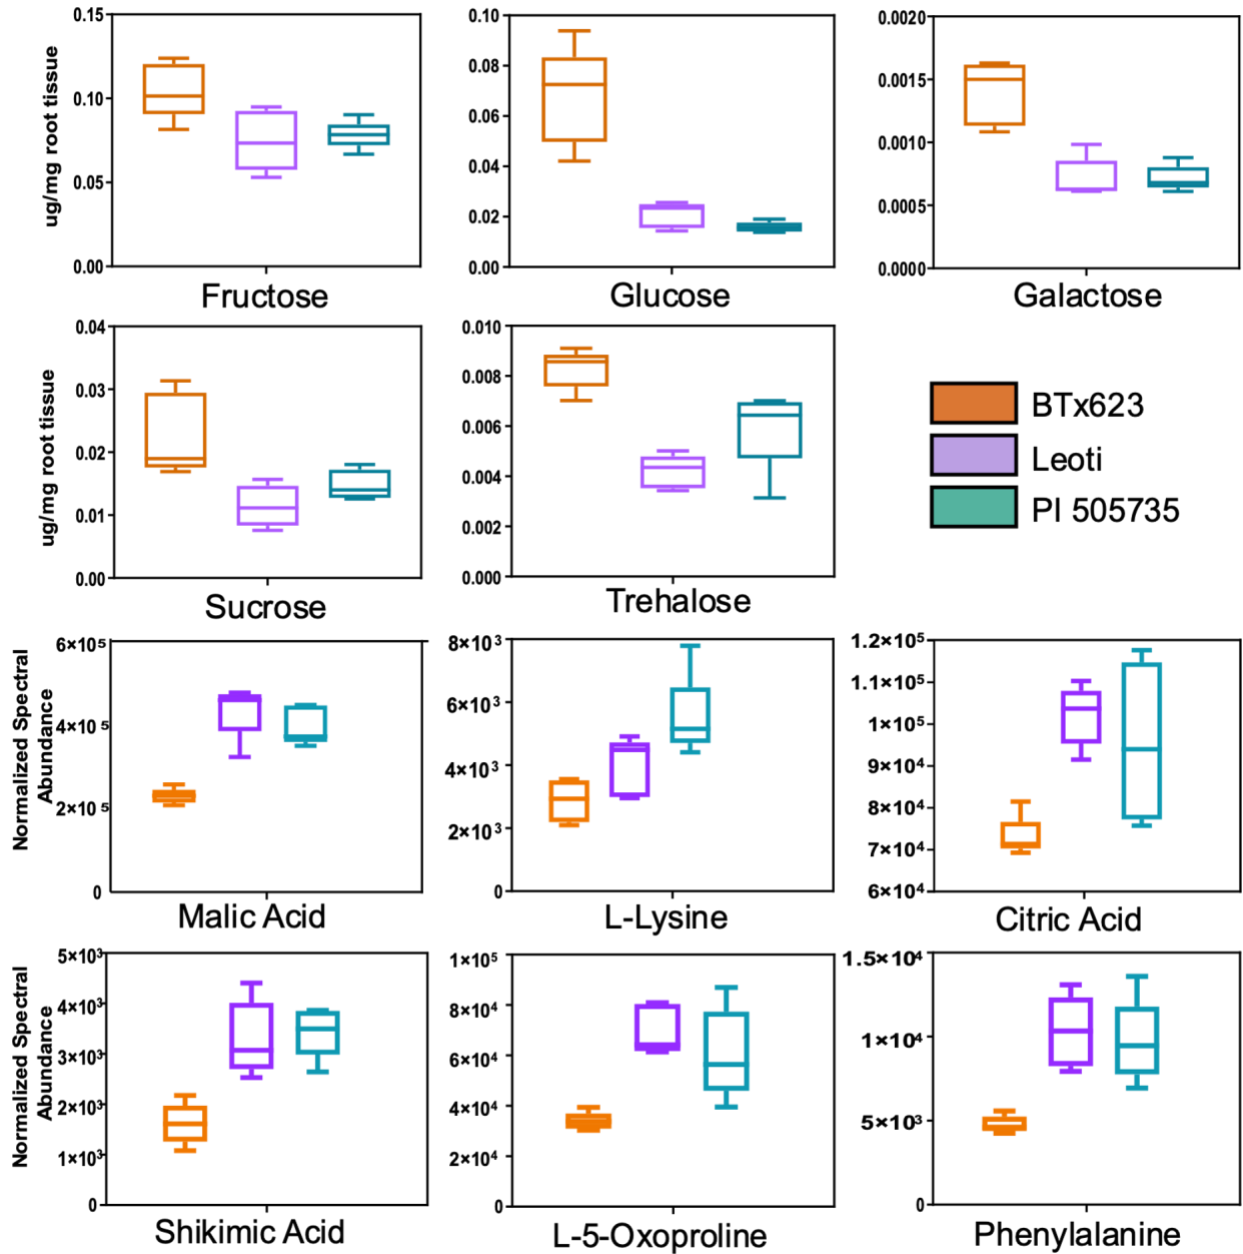

**Figure S1.** Normalized (to mg root weight) root exudate concentrations of three sorghum genotypes. Sorghum seedling (7 days old) sugar and organic acid concentrations were used to develop root exudate treatments, HST and HOT.

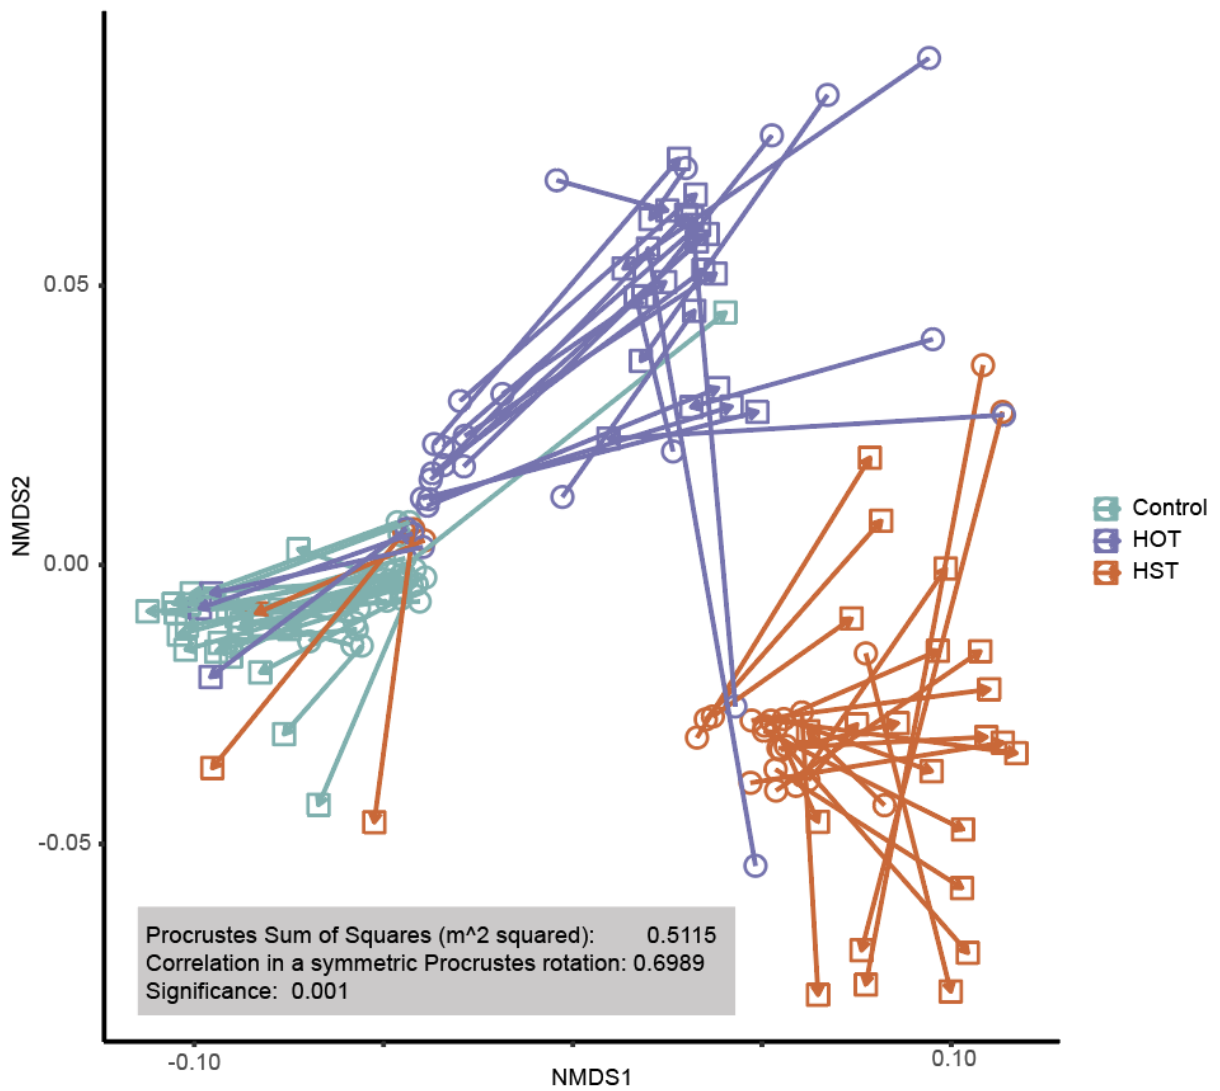

**Figure S2.** Procrustes ordination of exometabolite and 16S rRNA gene amplicon community NMDS ordinations showing the two datasets are significantly coordinated.

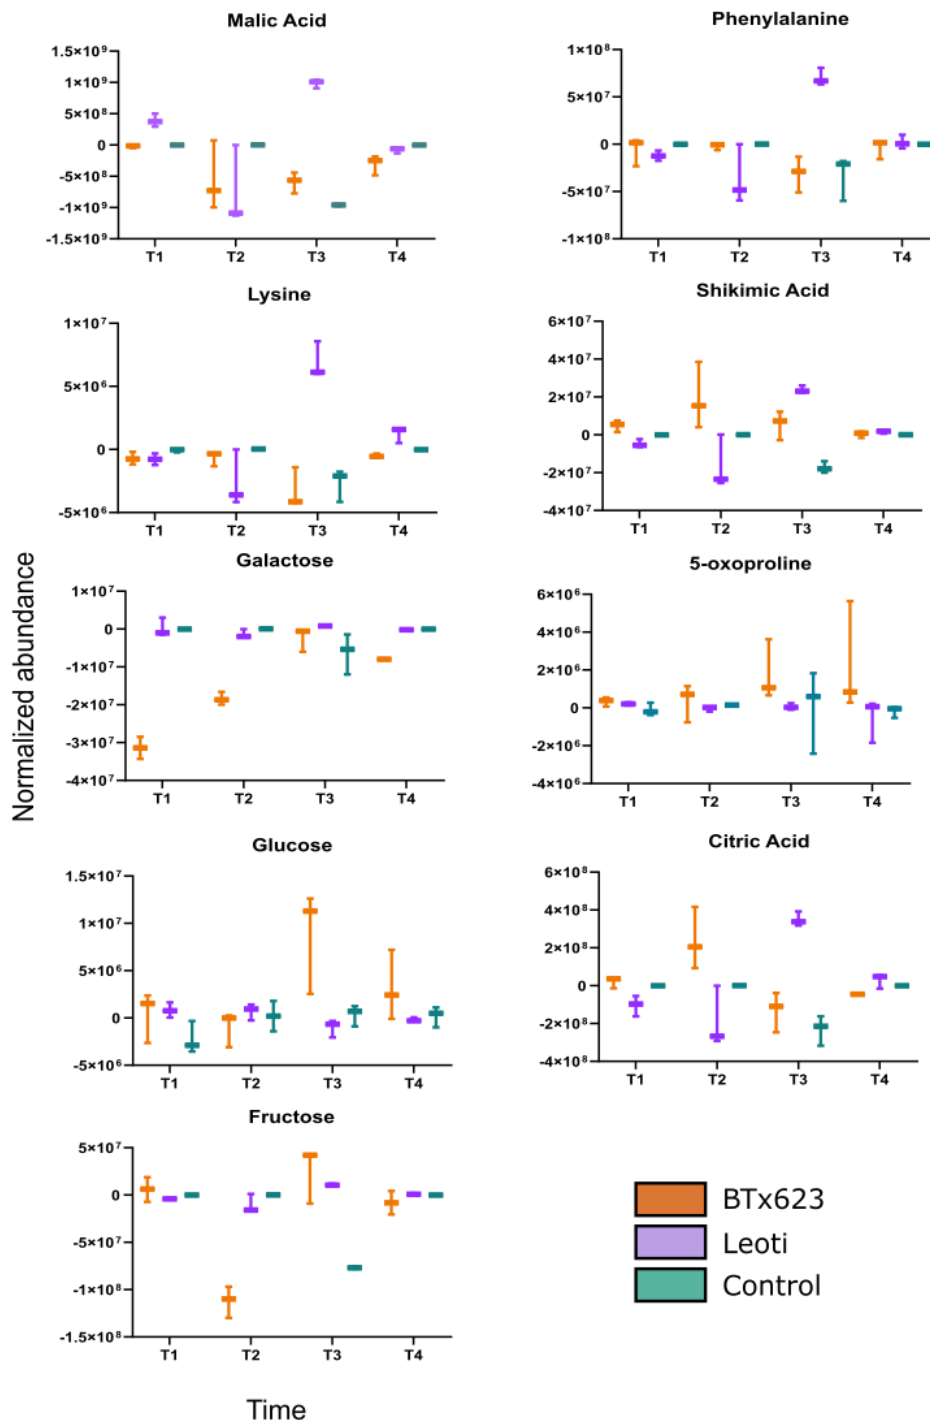

**Figure S3.** Consumption of added synthetic root exudate compounds. Time is representative of the 24h time period between exudate additions. Each value was calculated by subtracting the initial metabolite ( $M_T$ ) sample from the following day from the final metabolite sample from the previous day ( $M_{T-1}$ ) to calculate consumption. For instance, Day 1  $M_T$  was subtracted from Day 0  $M_{T-1}$  to calculate metabolite turnover for Time 1 (T1).

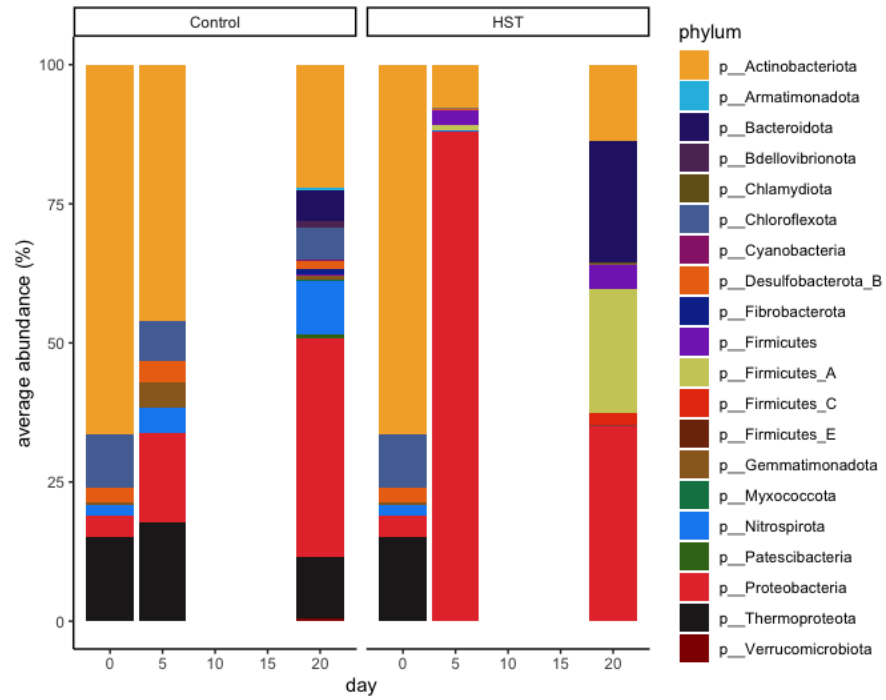

**Figure S4.** Phylum-level MAG abundance for control and HST microcosms at three timepoints. Values represent the average of replicates for each timepoint (n=3).

## Supplementary Tables

**Table S1.** The recipe for the phosphate buffered minimal medium (pH 6.5) used in the microcosms.

| <b>Component</b>                                                | <b>Added to 1000mL</b> |
|-----------------------------------------------------------------|------------------------|
| Ammonium Chloride (NH <sub>4</sub> Cl)                          | 0.25 g                 |
| Sodium phosphate, dibasic (Na <sub>2</sub> HPO <sub>4</sub> )   | 0.56 g                 |
| Sodium phosphate, monobasic (NaH <sub>2</sub> PO <sub>4</sub> ) | 1.6 g                  |

**Table S2.** Selected reaction monitoring transitions and instrument settings for each phytohormone. Product Ion 1 was used for quantitation and Product Ion 2 was used for qualification.

| Compound Name                     | Abbreviation | Precursor Ion m/z | Product Ion 1 m/z | Product Ion 2 m/z | Polarity | Collision Energy (eV) |
|-----------------------------------|--------------|-------------------|-------------------|-------------------|----------|-----------------------|
| dihydrophaseic acid               | DPA          | 280.9             | 237.1             | 170.9             | -        | 20                    |
| Gibberellic Acid 3                | GA3          | 344.9             | 239.1             | 220.9             | -        | 22                    |
| Indole-3 carboxylic acid          | ICA          | 161.9             | 88.9              | 116.8             | +        | -53                   |
| Salicylic Acid                    | SA           | 137.1             | 65.1              | 39.1              | -        | 24                    |
| Salicylic Acid-d4                 | SA-d4        | 141.1             | 96.9              |                   | -        | 29                    |
| Indole-3- Acetyl alanine          | IA-alanine   | 247.1             | 130               | 103               | +        | -22                   |
| Phaseic Acid                      | PA           | 279               | 139               | 121.9             | -        | 19                    |
| Indole-3-Acetic Acid              | IAA          | 175.9             | 129.9             | 102.9             | +        | -25                   |
| Indole-3-Acrylic Acid             | IA-Acra      | 188               | 169.8             | 114.9             | +        | -19                   |
| Abscisic Acid                     | ABA          | 263               | 152.9             | 219.2             | -        | 17                    |
| Abscisic Acid-d6                  | ABA-d6       | 269.1             | 159.1             |                   | -        | 18                    |
| Indole-3-Acetonitrile             | IANitrile    | 157.1             | 129.8             | 117               | +        | -15                   |
| Jasmonic Acid                     | JA           | 210.9             | 150.8             | 193               | +        | -18                   |
| Jasmonic Acid-d5                  | JA-d5        | 215.9             | 134.9             |                   | +        | -16                   |
| Indole-3-Butyric Acid             | IBA          | 204.1             | 117               | 130.1             | +        | -46                   |
| Gibberellic Acid 4                | GA4          | 330.9             | 287               | 243.1             | -        | 26                    |
| oxophytodienoic acid              | OPDA         | 290.9             | 164.9             | 247.2             | -        | 28                    |
| Methyl Jasmonate 1-               | meJA         | 225.4             | 104.9             | 91.1              | +        | -45                   |
| Aminocyclopropane Carboxylic Acid | ACC          | 101.9             | 56.2              | 30.3              | +        | -19                   |
| Benzoic Acid                      | BA           | 122.9             | 45.1              | 51                | +        | -47                   |
| Blumenol C Glucoside              |              | 373.3             | 193.2             | 134.9             | +        | -28                   |
| Blumenol B                        |              | 227.2             | 107.1             | 139.1             | +        | -33                   |



**Table S3.** Compounds and total amounts in each treatment used in microcosms experiment, see supplementary files S5 and S6 for calculations.

| <b>Compound</b>       | <b>High Sugar Treatment (ug/day)</b> | <b>High Sugar Treatment (ug total for 5 days)</b> | <b>High Sugar Treatment (mg total for 5 reps)</b> | <b>High Organic Acid Treatment (ug/day)</b> | <b>High Organic Acid Treatment (ug total for 5 days)</b> | <b>High Organic Acid Treatment (mg total for 5 reps)</b> |
|-----------------------|--------------------------------------|---------------------------------------------------|---------------------------------------------------|---------------------------------------------|----------------------------------------------------------|----------------------------------------------------------|
| <b>Malic acid</b>     | 58122.08                             | 290610.38                                         | 1453.05                                           | 312547.18                                   | 1562735.89                                               | 7813.68                                                  |
| <b>Citric acid</b>    | 18399.96                             | 91999.79                                          | 460.00                                            | 68949.51                                    | 344747.54                                                | 1723.74                                                  |
| <b>Phenylalanine</b>  | 1281.11                              | 6405.53                                           | 32.03                                             | 6374.09                                     | 31870.43                                                 | 159.35                                                   |
| <b>L-5-Oxoproline</b> | 8983.02                              | 44915.11                                          | 224.58                                            | 44747.52                                    | 223737.58                                                | 1118.69                                                  |
| <b>Shikimic acid</b>  | 405.05                               | 2025.25                                           | 10.13                                             | 2078.10                                     | 10390.52                                                 | 51.95                                                    |
| <b>L-Lysine</b>       | 806.82                               | 4034.08                                           | 20.17                                             | 2942.24                                     | 14711.21                                                 | 73.56                                                    |
| <b>Glucose</b>        | 3243.70                              | 16218.51                                          | 81.09                                             | 1004.44                                     | 5022.19                                                  | 25.11                                                    |
| <b>Sucrose</b>        | 1079.57                              | 5397.84                                           | 26.99                                             | 63.39                                       | 316.94                                                   | 1.58                                                     |
| <b>Fructose</b>       | 5017.97                              | 25089.85                                          | 125.45                                            | 3603.69                                     | 18018.45                                                 | 90.09                                                    |
| <b>Galactose</b>      | 67.16                                | 335.79                                            | 1.68                                              | 34.35                                       | 171.73                                                   | 0.86                                                     |
| <b>Trehalose</b>      | 397.77                               | 1988.83                                           | 9.94                                              | 200.73                                      | 1003.65                                                  | 5.02                                                     |
